# Supplementary material for: Early Back-to-Africa Migration into the Horn of Africa
Source: PubMed Central journal article supplement (PMC4055572; doi:10.1371/journal.pgen.1004393), 2014-06-12
Supplement: pgen.1004393.s017.pdf [file pgen.1004393.s017.pdf]

**Supplementary Text S1: Affinities of the Ethio-Somali ancestry component**

Our analysis of the Ethio-Somali ancestry component revealed at K=12 produced three results that support its non-African affinities. First, the lowest pairwise  $F_{ST}$  values estimated for the Ethio-Somali ancestral population from the ADMIXTURE analysis are with the Maghrebi and Arabian ancestral populations (0.074, 0.083) (the Maghrebi ancestry component derives from an early back-to-Africa migration into North Africa [1,2]).  $F_{ST}$  values are on average lower between the Ethio-Somali component and non-African populations (mean=0.097) than with sub-Saharan African populations (mean=0.126) (see figure immediately below).

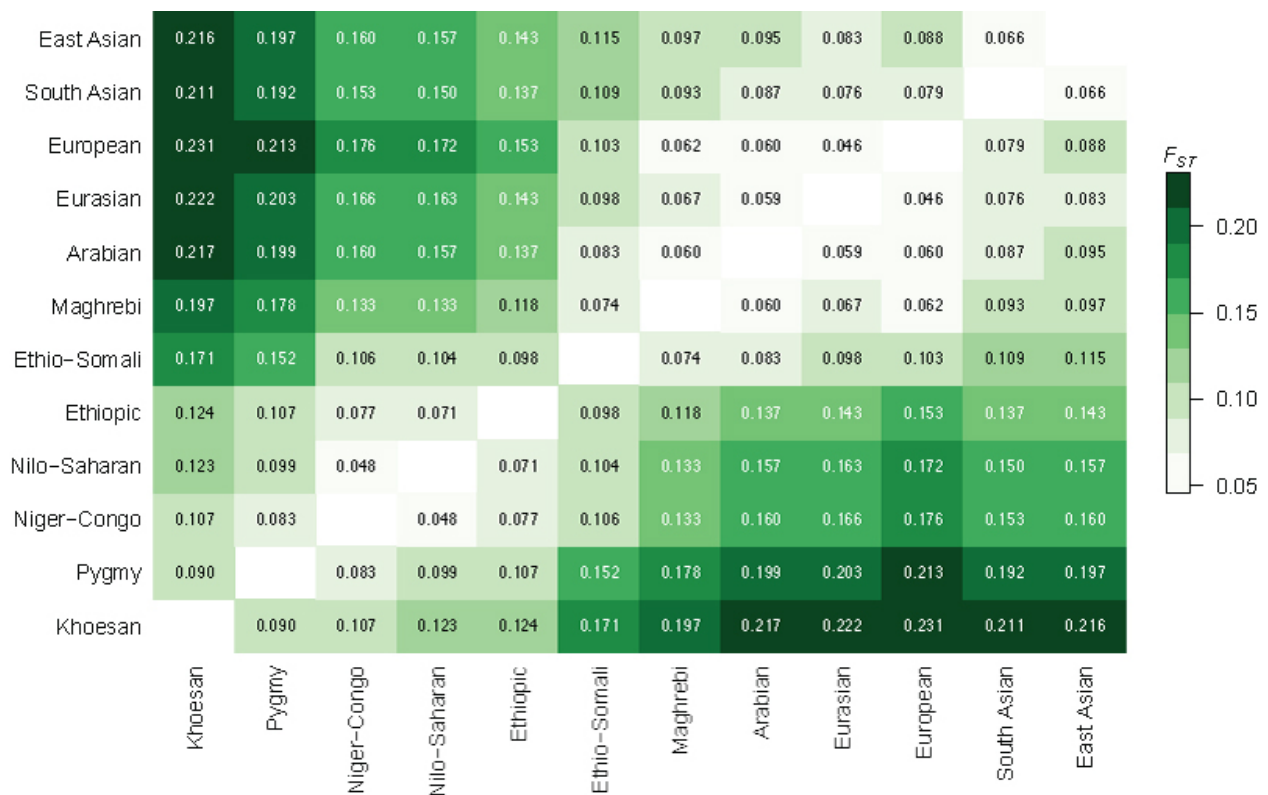

**Figure S1-1 – Pairwise  $F_{ST}$  estimates show the non-African affinities of the Ethio-Somali.**

The Ethio-Somali ancestry component has the lowest pairwise  $F_{ST}$  values with the Maghrebi and Arabian ancestral populations (0.074, 0.083).  $F_{ST}$  values are on average lower between the Ethio-Somali component and non-African populations (mean=0.097) than with sub-Saharan African populations (mean=0.126).

Second, we conducted three formal tests for admixture and found that eight of the HOA populations had statistically significant signals of admixture with non-African populations for all three tests (Tables S2, S3, S4). For these eight populations, we estimated the proportion of non-African ancestry using both the admixture bounds extension of the  $f_3$  test and  $f_4$  ratio estimation [3]. We also summed the non-African ancestry components from the ADMIXTURE analysis with and without the Ethio-Somali component. The  $f_3$  bounds and  $f_4$  ratio estimates agree that all admixed HOA populations have around 50% non-African ancestry (see table immediately below). The ADMIXTURE estimates of non-African ancestry that do not include the Ethio-Somali values are substantially lower, averaging around 20%. Only if we include the Ethio-Somali component as non-African ancestry do the ADMIXTURE values become consistent with the  $f_3$  bounds and  $f_4$  ratio estimates.

***Estimates of non-African ancestry in admixed Horn of Africa populations.***

| <b>Population</b> | <b><math>f_3</math> bounds</b> | <b><math>f_4</math> ratio range</b> | <b>ADMIXTURE<br/>(-Ethio-Somali)</b> | <b>ADMIXTURE<br/>(+Ethio-Somali)</b> |
|-------------------|--------------------------------|-------------------------------------|--------------------------------------|--------------------------------------|
| Afar              | 0.47 – 0.66                    | 0.49 – 0.55                         | 0.26                                 | 0.69                                 |
| Amhara            | 0.48 – 0.61                    | 0.52 – 0.71                         | 0.30                                 | 0.65                                 |
| Ari Cultivator    | 0.42 – 0.79                    | 0.24 – 0.50                         | 0.03                                 | 0.20                                 |
| Oromo             | 0.58 – 0.76                    | 0.42 – 0.65                         | 0.24                                 | 0.55                                 |
| Ethiopian Somali  | 0.38 – 0.60                    | 0.43 – 0.65                         | 0.11                                 | 0.64                                 |
| Somali            | 0.39 – 0.59                    | 0.43 – 0.65                         | 0.09                                 | 0.66                                 |
| Tygray            | 0.50 – 0.62                    | 0.54 – 0.57                         | 0.32                                 | 0.68                                 |
| Wolayta           | 0.52 – 0.74                    | 0.39 – 0.60                         | 0.17                                 | 0.44                                 |

Third, the first dimension of the IBS MDS analysis appears to represent the proportion of non-African ancestry (Main Text Figure 1). If so, there should be a positive relationship between non-African ancestry proportions estimated from the ADMIXTURE analysis (K=12) and the MDS first dimension values. We fit linear models testing this relationship for all ancestry components that contribute at least 5% ancestry to two or more HOA populations (see table immediately below). As predicted, there is a positive relationship between the first MDS dimension and Arabian or Eurasian ancestry (and a negative relationship between the first MDS dimension and Nilo-Saharan or Ethiopic ancestry). The relationship between Ethio-Somali ancestry and the first MDS dimension is both statistically significant and positive ( $p = 1.3 \times 10^{-6}$ ,  $R^2 = 0.14$ ).

***Relationship between ADMIXTURE ancestry and first MDS dimension<sup>1</sup>.***

|              | <b>Direction</b> | <b>R<sup>2</sup></b> | <b>p</b>                |
|--------------|------------------|----------------------|-------------------------|
| Nilo-Saharan | negative         | 0.67                 | $< 2.2 \times 10^{-16}$ |
| Ethiopic     | negative         | 0.10                 | $2.0 \times 10^{-6}$    |
| Ethio-Somali | positive         | 0.14                 | $1.3 \times 10^{-6}$    |
| Arabian      | positive         | 0.52                 | $1.3 \times 10^{-15}$   |
| Eurasian     | positive         | 0.02                 | n.s.                    |

<sup>1</sup> For those ancestry components present at 5% or greater in two or more Horn of Africa populations.

Taken in combination, these three lines of evidence offer strong support to the hypothesis that the Ethio-Somali ancestry component has a non-African origin, and results are consistent with earlier findings of substantial non-African ancestry in HOA populations [4–6].

### ***Supplemental Text References***

1. Henn BM, Botigué LR, Gravel S, Wang W, Brisbin A, et al. (2012) Genomic Ancestry of North Africans Supports Back-to-Africa Migrations. *PLoS Genet* 8: e1002397. doi:10.1371/journal.pgen.1002397.
2. Sánchez-Quinto F, Botigué LR, Civit S, Arenas C, Ávila-Arcos MC, et al. (2012) North African Populations Carry the Signature of Admixture with Neandertals. *PLoS ONE* 7: e47765. doi:10.1371/journal.pone.0047765.
3. Patterson NJ, Moorjani P, Luo Y, Mallick S, Rohland N, et al. (2012) Ancient Admixture in Human History. *Genetics* 192: 1065–1093. doi:10.1534/genetics.112.145037.
4. Cavalli-Sforza LLL, Menozzi P, Piazza A (1994) *History And Geography Of Human Genes*. Princeton: Princeton University Press. 1114 p.
5. Passarino G, Semino O, Quintana-Murci L, Excoffier L, Hammer MF, et al. (1998) Different genetic components in the Ethiopian population, identified by mtDNA and Y-chromosome polymorphisms. *Am J Hum Genet* 62: 420–434. doi:10.1086/301702.
6. Pagani L, Kivisild T, Tarekegn A, Ekong R, Plaster C, et al. (2012) Ethiopian Genetic Diversity Reveals Linguistic Stratification and Complex Influences on the Ethiopian Gene Pool. *Am J Hum Genet* 91: 83–96. doi:10.1016/j.ajhg.2012.05.015.
