# Supplementary material for: Early Back-to-Africa Migration into the Horn of Africa
Source: PLoS Genet. 2014 Jun 12;10(6):e1004393. doi: 10.1371/journal.pgen.1004393 (PMC4055572; doi:10.1371/journal.pgen.1004393)
Supplement: Table S7 — Verification of f3 test results from main (17K SNP) dataset in verification 90K and 260K datasets. (XLSX) [file pgen.1004393.s013.xlsx]

## Sheet: Sheet1
Verification of f3 test results from main (17k SNP) dataset in verification 90k and 260k datasets
Region	non-African reference	African reference	Target	f3-17k	Z-17k	f3-90k	Z-90k	f3-260k	Z-260k
1-Horn	SAR	Sudanese	Afar	-0.025578	-35.146	-0.024886	-53.61	-0.025439	-66.674
1-Horn	SAR	Sudanese	Amhara	-0.028871	-45.068	-0.028902	-72.754	-0.029332	-87.777
1-Horn	SAR	Sudanese	Anuak	6.4e-05	0.107	0.000154	0.475	0.000218	0.904
1-Horn	SAR	Juhoansi	Cultivator	-0.016216	-13.886			-0.014399	-29.998
1-Horn	TSI	MBU	Gumuz	0.006397	5.073	0.009888	14.704	0.008887	17.036
1-Horn	SAR	Juhoansi	Oromo	-0.030084	-31.158			-0.029388	-71.261
1-Horn	SAR	Sudanese	Somali	-0.022393	-34.145	-0.02176	-51.579	-0.02249	-62.201
1-Horn	SAR	Sudanese	Tygray	-0.029438	-45.966	-0.029081	-73.256	-0.029651	-88.433
1-Horn	SAR	Juhoansi	Wolayta	-0.027235	-22.215			-0.02568	-54.331
2-North Africa	SAR	YRI	Algeria	-0.024851	-41.661	-0.024855	-64.473
2-North Africa	SAR	MBU	Egypt	-0.019871	-25.922	-0.019497	-45.285
2-North Africa	SAR	MBU	egypt2	-0.021624	-24.424			-0.021861	-53.627
2-North Africa	SAR	YRI	Libya	-0.022793	-35.718	-0.02284	-57.811
2-North Africa	SAR	YRI	Morocco_N	-0.018995	-29.446	-0.019349	-49.144
2-North Africa	SAR	YRI	Morocco_S	-0.032239	-51.625	-0.031595	-80.201
2-North Africa	SAR	YRI	MOZ	-0.0189	-28.444	-0.019287	-46.06	-0.019481	-54.256
2-North Africa	SAR	YRI	Saharawi	-0.019979	-30.148	-0.020458	-50.049
2-North Africa	SAR	YRI	Tunisia	0.000506	0.61	0.000467	0.824
3-Middle East	SAR	MBU	BED	-0.009282	-12.366	-0.009294	-22.515	-0.009643	-29.788
3-Middle East	SAR	MBU	DRU	0.000108	0.15	0.000153	0.38	4.7e-05	0.141
3-Middle East	SAR	Sudanese	lebanon	-0.008106	-8.357			-0.008328	-17.411
3-Middle East	SAR	MBU	PAL	-0.009562	-13.249	-0.009801	-25.289	-0.009942	-31.843
3-Middle East	SAR	Sudanese	saudi	-0.008834	-10.898			-0.00867	-19.833
3-Middle East	SAR	MBU	syria	-0.008592	-9.139			-0.008219	-19.06
3-Middle East	SAR	MBU	yem2	-0.025074	-24.776			-0.024934	-53.05
4-Eurasia	CEU	MBU	ADY	0.000831	1.18	0.000854	2.24	0.00089	2.68
4-Eurasia	CEU	MBU	BRA	-0.000823	-1.111	-0.000575	-1.391	-0.000777	-2.218
4-Eurasia	Basque	Sudanese	FRE	-0.000533	-0.888	2.2e-05	0.066
4-Eurasia	CEU	MBU	HAZ	0.011442	11.823	0.01128	20.51	0.011344	23.724
4-Eurasia	SAR	MBU	iran	-0.006148	-7.879			-0.006773	-18.944
4-Eurasia	CEU	YRI	ORC	0.004282	7.297	0.003816	11.231	0.003728	14.227
4-Eurasia	CEU	MBU	PAT	-0.000742	-0.999	-0.000794	-2.045	-0.00058	-1.828
4-Eurasia	CEU	Juhoansi	RUS	0.000917	1.633			0.001327	5.695
5-sub-Saharan	TSI	Juhoansi	GuiGhanaKgal	-0.00842	-7.237			-0.006044	-10.359
5-sub-Saharan	SAR	Juhoansi	Herero	-0.00874	-5.878			-0.006668	-9.738
5-sub-Saharan	CEU	Juhoansi	Karretjie	-0.02508	-24.321			-0.023997	-44.307
5-sub-Saharan	CEU	Juhoansi	Khomani	-0.039267	-42.894			-0.038495	-83.074
5-sub-Saharan	TSI	Juhoansi	Khwe	-0.018169	-16.766			-0.014814	-29.605
5-sub-Saharan	SAR	MBU	LWK	-0.00572	-5.596	-0.004968	-9.535	-0.00538	-13.702
5-sub-Saharan	SAR	YRI	MAN	0.002184	3.748	0.003084	10.394	0.003186	12.927
5-sub-Saharan	SAR	MBU	MKK	-0.023063	-24.948	-0.022285	-46.834	-0.022895	-57.507
5-sub-Saharan	TSI	Juhoansi	Nama	-0.036703	-40.234			-0.035088	-79.175
5-sub-Saharan	turkey	Juhoansi	SABantu	-0.007582	-6.349			-0.004825	-10.236
5-sub-Saharan	turkey	Juhoansi	Xun	-0.013881	-13.971			-0.011202	-22.307
