# Supplementary material for: Early Back-to-Africa Migration into the Horn of Africa
Source: PLoS Genet. 2014 Jun 12;10(6):e1004393. doi: 10.1371/journal.pgen.1004393 (PMC4055572; doi:10.1371/journal.pgen.1004393)
Supplement: Table S8 — Verification of D statistic test results from main (17K SNP) dataset in verification 90K and 260K datasets. (XLSX) [file pgen.1004393.s014.xlsx]

## Sheet: Sheet1
Verification of D statistic test results from main (17k SNP) dataset in verification 90k and 260k datasets
Group	W	X	Y	Z	D-17k	Z-17k	D-90k	Z-90k	D-260k	Z-260k
1-Horn	MBU	Afar	PAP	BAS	0.0632	15.896	0.0633	27.533	0.0611	32.35
1-Horn	MBU	Amhara	PAP	BAS	0.0647	16.951	0.064	29.612	0.0619	34.491
1-Horn	MBU	Anuak	PAP	BAS	0.012	3.47	0.0098	5.467	0.0082	6.011
1-Horn	MBU	Cultivator	PAP	BAS	0.0325	9.392	0.0316	16.93	0.03	20.64
1-Horn	MBU	ESomali	PAP	BAS	0.0507	12.946	0.0515	23.578	0.0506	28.334
1-Horn	MBU	Gumuz	PAP	BAS	0.0166	4.599	0.0133	7.038	0.0111	7.588
1-Horn	MBU	Oromo	PAP	BAS	0.0575	15.415	0.0572	28.236	0.0549	32.344
1-Horn	MBU	Somali	PAP	BAS	0.0534	14.17	0.0538	25.372	0.052	29.914
1-Horn	MBU	Tygray	PAP	BAS	0.0666	17.304	0.0663	29.561	0.0641	35.65
1-Horn	MBU	Wolayta	PAP	BAS	0.0491	12.48	0.0483	22.645	0.0472	26.97
2-North Africa	PAP	YRI	BAS	Algeria	0.0682	28.824	0.0702	46.241
2-North Africa	PAP	YRI	BAS	Egypt	0.0478	19.829	0.0502	35.363
2-North Africa	PAP	YRI	BAS	egypt2	0.0527	20.149			0.0545	43.145
2-North Africa	PAP	YRI	BAS	Libya	0.0597	24.684	0.0612	42.274
2-North Africa	PAP	YRI	BAS	Morocco_N	0.051	21.796	0.0563	39.643
2-North Africa	PAP	YRI	BAS	Morocco_S	0.1071	36.356	0.1088	61.334
2-North Africa	PAP	YRI	BAS	MOZ	0.075	29.604	0.0788	51.492	0.0781	59.679
2-North Africa	PAP	YRI	BAS	Saharawi	0.075	27.498	0.0783	48.587
2-North Africa	PAP	YRI	BAS	Tunisia	0.0524	18.949	0.0552	32.548
3-Middle East	PAP	MBU	BAS	BED	0.0357	14.241	0.0384	26.523	0.0372	32.819
3-Middle East	PAP	MBU	BAS	DRU	0.0119	4.917	0.0131	9.684	0.0127	11.831
3-Middle East	PAP	Sudanese	BAS	lebanon	0.0218	7.752			0.021	15.594
3-Middle East	PAP	YRI	BAS	PAL	0.0272	12.927	0.0282	22.407	0.0275	26.156
3-Middle East	PAP	Sudanese	BAS	saudi	0.0297	10.548			0.0311	23.094
3-Middle East	PAP	MBU	BAS	syria	0.0197	6.81			0.0192	14.876
3-Middle East	PAP	MBU	BAS	yem2	0.0612	18.531			0.0627	37.384
4-Eurasia	PAP	MBU	BAS	ADY	0.0004	0.161	-0.0018	-1.25	-0.0031	-2.507
4-Eurasia	PAP	MBU	BAS	BRA	0.0031	1.154	0.0013	0.835	0.0009	0.665
4-Eurasia	PAP	YRI	BAS	CEU	0.0013	0.802	-0.0004	-0.401	-0.0015	-1.916
4-Eurasia	PAP	Sudanese	BAS	FRE	0.0001	0.077	0.0001	0.081	-0.0007	-0.723
4-Eurasia	PAP	MBU	BAS	HAZ	-0.0324	-10.403	-0.0319	-16.226	-0.035	-20.115
4-Eurasia	PAP	MBU	BAS	iran	0.011	4.446			0.0108	8.886
4-Eurasia	PAP	YRI	BAS	ORC	-0.0002	-0.076	-0.0015	-1.213	-0.003	-2.78
4-Eurasia	PAP	MBU	BAS	PAT	-0.0124	-4.569	-0.0131	-8.446	-0.0148	-11.521
4-Eurasia	PAP	Juhoansi	BAS	RUS	-0.0068	-2.891			-0.0099	-8.764
5-sub-Saharan	MBU	GuiGhanaKgal	PAP	BAS	0.0107	3.316			0.0046	3.832
5-sub-Saharan	MBU	Herero	PAP	BAS	0.0198	5.384			0.016	11.364
5-sub-Saharan	MBU	Karretjie	PAP	BAS	0.0159	4.85			0.0108	8.971
5-sub-Saharan	MBU	Khomani	PAP	BAS	0.027	8.853			0.023	18.584
5-sub-Saharan	MBU	Khwe	PAP	BAS	0.0113	3.522			0.0068	5.81
5-sub-Saharan	MBU	LWK	PAP	BAS	0.0146	4.688	0.0115	7.12	0.0099	8.117
5-sub-Saharan	MBU	MAN	PAP	BAS	0.0145	4.415	0.0102	5.702	0.0087	6.494
5-sub-Saharan	MBU	MKK	PAP	BAS	0.0341	10.614	0.0325	18.57	0.0308	22.296
5-sub-Saharan	MBU	Nama	PAP	BAS	0.026	8.204			0.0213	17.254
5-sub-Saharan	MBU	SABantu	PAP	BAS	0.0092	2.903			0.0055	4.518
5-sub-Saharan	MBU	Xun	PAP	BAS	0.009	2.763			0.0027	2.288
