# Supplementary material for: Early Back-to-Africa Migration into the Horn of Africa
Source: PLoS Genet. 2014 Jun 12;10(6):e1004393. doi: 10.1371/journal.pgen.1004393 (PMC4055572; doi:10.1371/journal.pgen.1004393)
Supplement: Table S9 — Verification of ALDER test results from main (17K SNP) dataset in verification 90K and 260K datasets. (XLSX) [file pgen.1004393.s015.xlsx]

## Sheet: Sheet1
Verification of ALDER test results from main (17k SNP) dataset in verification 90k and 260k datasets
Group	Target	non-African reference	African reference	p-value	Z-17k	amplitude-17k	Z-90k	amplitude-90k	Z-260k	amplitude-260k
1-Horn	Afar	turkey	Sudanese	0.012	3.36	0.0011925			6.08	0.000434
1-Horn	Amhara	SAR	Juhoansi	0.00062	4.1	0.00090977			5.17	0.00046315
1-Horn	Cultivator	SAR	Juhoansi	9.1e-05	4.52	0.00086528			4.14	0.00050007
1-Horn	ESomali	TSI	Juhoansi	2.1e-05	4.83	0.00133757			3.74	0.00052444
1-Horn	Gumuz	SAR	YRI	0.014	3.3	7.984e-05	4.82	4.064e-05	6.51	2.679e-05
1-Horn	Oromo	Basque	Sudanese	5.3e-06	5.09	0.00081309	7.21	0.00052337
1-Horn	Somali	Basque	Juhoansi	2.4e-05	4.8	0.00097022
1-Horn	Tygray	SAR	Sudanese	0.00024	4.31	0.00089692	9.71	0.00073895	6.11	0.00058859
1-Horn	Wolayta	CEU	YRI	0.0041	3.64	0.00047147	5.49	0.00052757	4.48	0.00044758
2-North Africa	Algeria	SAR	YRI	2.2e-12	7.39	0.00057862	12.49	0.0004201
2-North Africa	Egypt	Basque	MBU	3.3e-07	5.6	0.00065145	6.71	0.00044258
2-North Africa	Libya	SAR	YRI	8.8e-05	4.53	0.00044657	6.18	0.00032487
2-North Africa	Morocco_N	CEU	YRI	6.8e-06	5.05	0.00038975	8.7	0.00030842
2-North Africa	Morocco_S	TSI	YRI	4.8e-06	5.11	0.00057248	6.84	0.00042305
2-North Africa	MOZ	Basque	YRI	7.4e-09	6.22	0.00052941	8.72	0.00037449
2-North Africa	Saharawi	Basque	Sudanese	1.1e-07	5.78	0.00043016	3.66	0.00025565
2-North Africa	Tunisia	SAR	Sudanese	0.013	3.33	0.00049273	4.52	0.0002544
3-Middle East	African-Qatari	SAR	MBU	9.9e-11	6.87	0.00070578
3-Middle East	Arab-Qatari	GIH	Juhoansi	3.7e-05	4.71	0.00015359
3-Middle East	BED	turkey	Sudanese	0.0071	3.49	0.00031302
3-Middle East	PAL	SAR	YRI	1.4e-12	7.45	0.00033401	8.52	0.00026859	13.85	0.00022695
3-Middle East	Persian-Qatari	GIH	MBU	6.8e-10	6.59	0.0002829			9.71	0.00027605
3-Middle East	saudi	GIH	Juhoansi	0.011	3.38	0.00021669			1.94	0.00011739
3-Middle East	YEM	GIH	YRI	8.7e-05	4.53	0.00019469
5-sub-Saharan	Fulani	SAR	Juhoansi	0.0043	3.63	0.00089731
5-sub-Saharan	Herero	SAR	Juhoansi	0.00016	4.4	0.00050723			5.42	0.00036843
5-sub-Saharan	Karretjie	SAR	MBU	1e-18	9.13	0.00087129			11.92	0.00076913
5-sub-Saharan	Khomani	CEU	Juhoansi	8.7e-25	10.54	0.00142187
5-sub-Saharan	Khwe	Basque	Juhoansi	0.002	3.82	0.00051512
5-sub-Saharan	MKK	TSI	MBU	3e-08	6	0.00053725	8.32	0.00020489	15.29	0.00022508
5-sub-Saharan	Nama	CEU	Blacksmith	4.7e-08	5.93	0.00027224			13.78	0.00021509
5-sub-Saharan	SABantu	SAR	Juhoansi	1.4e-06	5.34	0.00035029			4.19	0.00019647
5-sub-Saharan	Xun	SAR	Juhoansi	1.5e-15	8.31	0.00048234
